## RESEARCH ARTICLE

# Belgian *Culex pipiens pipiens* are competent vectors for West Nile virus while *Culex modestus* are competent vectors for Usutu virus

Alina Soto<sup>1</sup>, Lander De Coninck<sup>2</sup>, Ann-Sophie Devlies<sup>1</sup>, Celine Van De Wiele<sup>1</sup>, Ana Lucia Rosales Rosas<sup>1</sup>, Lanjiao Wang<sup>1</sup>, Jelle Matthijssens<sup>2</sup>, Leen Delang<sup>1\*</sup>

**1** Department of Microbiology, Immunology and Transplantation, Rega Institute for Medical Research, Laboratory of Virology and Chemotherapy, KU Leuven, Leuven, Belgium, **2** Department of Microbiology, Immunology and Transplantation, Rega Institute for Medical Research, Laboratory of Clinical and Epidemiological Virology, KU Leuven, Leuven, Belgium

\* [leen.delang@kuleuven.be](mailto:leen.delang@kuleuven.be)

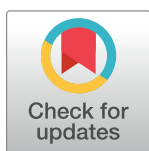

## Abstract

### OPEN ACCESS

**Citation:** Soto A, De Coninck L, Devlies A-S, Van De Wiele C, Rosales Rosas AL, Wang L, et al. (2023) Belgian *Culex pipiens pipiens* are competent vectors for West Nile virus while *Culex modestus* are competent vectors for Usutu virus. PLoS Negl Trop Dis 17(9): e0011649. <https://doi.org/10.1371/journal.pntd.0011649>

**Editor:** Michael R. Holbrook, NIAID Integrated Research Facility, UNITED STATES

**Received:** May 26, 2023

**Accepted:** September 7, 2023

**Published:** September 20, 2023

**Copyright:** © 2023 Soto et al. This is an open access article distributed under the terms of the [Creative Commons Attribution License](https://creativecommons.org/licenses/by/4.0/), which permits unrestricted use, distribution, and reproduction in any medium, provided the original author and source are credited.

**Data Availability Statement:** The data that support the findings of this study are publicly available from The Open Science Framework with the identifier DOI: [10.17605/OSF.IO/M2N8Y](https://doi.org/10.17605/OSF.IO/M2N8Y).

**Funding:** Funding was awarded internally to LD and JM by KU Leuven (Grant ID: C14/20/108). The funders had no role in study design, data collection and analysis, decision to publish, or preparation of the manuscript.

## Background

West Nile virus (WNV) and Usutu virus (USUV) are emerging arthropod-borne viruses (arboviruses) in Europe transmitted by *Culex* mosquitoes. In Belgium, it is currently unknown which *Culex* species are competent vectors for WNV or USUV and if these mosquitoes carry *Wolbachia*, an endosymbiotic bacterium that can block arbovirus transmission. The aims of our study were to measure the vector competence of Belgian *Culex* mosquitoes to WNV and USUV and determine if a naturally acquired *Wolbachia* infection can influence virus transmission.

## Methodology/Principal findings

Female *Culex* mosquitoes were captured from urban and peri-urban sites in Leuven, Belgium and offered an infectious bloodmeal containing WNV lineage 2, USUV European (EU) lineage 3, or USUV African (AF) lineage 3. Blood-fed females were incubated for 14 days at 25°C after which the body, head, and saliva were collected to measure infection, dissemination, and transmission rates as well as transmission efficiency. Mosquito species were identified by qRT-PCR or Sanger sequencing, the presence of infectious virus in mosquitoes was confirmed by plaque assays, and viral genome copies were quantified by qRT-PCR. *Culex pipiens pipiens* were able to transmit WNV (4.3% transmission efficiency, n = 2/47) but not USUV (EU lineage: n = 0/56; AF lineage: n = 0/37). In contrast, *Culex modestus* were able to transmit USUV (AF lineage: 20% transmission efficiency, n = 1/5) but not WNV (n = 0/6). We found that the presence or absence of *Wolbachia* was species-dependent and did not associate with virus transmission.

**Competing interests:** The authors have declared that no competing interests exist.

## Conclusions/Significance

This is the first report that Belgian *Culex* mosquitoes can transmit both WNV and USUV, forewarning the risk of human transmission. More research is needed to understand the potential influence of *Wolbachia* on arbovirus transmission in *Culex modestus* mosquitoes.

## Author summary

West Nile virus and Usutu virus can cause seasonal epidemics in humans. They are maintained in a transmission cycle between wild birds and *Culex* mosquitoes, and humans that are bitten by infected mosquitoes can develop life-threatening neurological disease. Certain *Culex* species carry the symbiotic bacterium *Wolbachia* which can block virus transmission in mosquitoes. In Belgium, it is currently unknown which *Culex* species can transmit West Nile virus and/or Usutu virus, or if they carry *Wolbachia* bacteria. In our study, we captured wild mosquitoes from Belgium and infected them with West Nile virus or Usutu virus. We found that a common European species (*Culex pipiens pipiens*, the northern house mosquito) could transmit West Nile virus, whereas a lesser-known species (*Culex modestus*) could transmit Usutu virus. *Wolbachia* bacteria could be found in almost all *Culex pipiens pipiens*, but not in *Culex modestus*, suggesting that *Wolbachia* prevalence is species-specific. More research is needed to understand if *Wolbachia* can influence West Nile virus and Usutu virus transmission in *Culex* mosquitoes. This is the first report on the ability of *Culex* mosquitoes to transmit West Nile virus and Usutu virus in Belgium, forewarning the risk of transmission to humans.

## Introduction

West Nile virus (WNV) and Usutu virus (USUV) are emerging arthropod-borne viruses (arboviruses) in Europe. They are both flaviviruses (Family: *Flaviviridae*) and members of the Japanese encephalitis serocomplex, sharing considerable similarities in their transmission and clinical relevance. The lifecycle of WNV and USUV is enzootic: they amplify in resident and migratory birds and are transmitted to new hosts via intermediary mosquito vectors. Mammals, including humans, can become incidental hosts of WNV or USUV when bitten by infected mosquitoes. From 2010 to 2022, there were over 5,800 reported human cases with 378 deaths caused by WNV in Europe [1,2]. In contrast, there have been few human cases of USUV detected in Europe—only 17 reports of neuroinvasive disease so far—as symptomatic infections are rarely detected [3]. Cross-reactive WNV nucleic acid tests from human blood and organ donor screenings have led to the incidental identification of passive USUV cases, which suggests that the true incidence of USUV is underestimated [3]. In Belgium, no human cases of WNV or USUV have been reported, but the country is considered at-risk. Neighboring countries have experienced recent human cases of WNV, with detection of WNV RNA in native birds and mosquitoes in the Netherlands [4,5] and Germany [6–8], while USUV was reported endemic to resident birds and bats in Belgium since 2016 [9].

The most important vectors for WNV and USUV are members of the genus *Culex* (Family: *Culicidae*). The vectors established in Europe are *Culex pipiens* (Linnaeus 1758), *Culex modestus* (Ficalbi 1889), *Culex torrentium* (Martini 1925), and *Culex perexiguus* (Theobald 1903) [10–17], of which all but the latter are present in Belgium [18,19]. *Culex pipiens sensu lato* (s.l.) can be divided into two morphologically identical but behaviorally distinct biotypes: *Culex*

*pipiens* (*p.*) *pipiens* (Linnaeus 1758) and *Culex p. molestus* (Forskål 1775). *Culex p. pipiens* is an established European vector for WNV, based on evidence from vector competence studies using field-caught mosquitoes [11,20,21]. USUV RNA has been detected in native European *Culex p. pipiens* [22,23], but so far vector competence studies using live mosquitoes have been restricted to laboratory colonies [24,25]. Of the two biotypes, *pipiens* is considered the more efficient vector for both WNV [21,26] and USUV [25]. In field-captured *Culex modestus* mosquitoes, WNV and USUV RNA have been detected [14,15,27–32], but currently the only evidence of WNV vector competence in live mosquitoes comes from laboratory colonies [12,33]. So far, there are no measures of USUV vector competence in *Culex modestus* using field or laboratory mosquitoes. Therefore, the vector competence of *Culex p. pipiens* to USUV, and of *Culex modestus* to both WNV and USUV, using native vectors from natural habitats have not been investigated.

The presence of *Wolbachia pipientis* in mosquitoes should be an important consideration in vector competence studies. *Wolbachia* are intracellular gram-negative alphaproteobacteria found to naturally infect most arthropod species worldwide [34]. In arboviral research, *Wolbachia pipientis* are well known for their ability to reduce the fitness and reproduction of mosquitoes and suppress arbovirus transmission, particularly in *Aedes aegypti* [35]. Several strains of *Wolbachia* can directly interfere with arbovirus replication in mosquitoes [reviewed by Ant et al., 2023 [36]], but the evidence on *Wolbachia*-mediated inhibition of WNV is contradictory, as it remains unclear if *Wolbachia* enhances or protects against WNV transmission [37–41]. More than 90% of *Culex pipiens* s.l. harbor *Wolbachia* [37,42], whereas there is limited evidence that *Culex modestus* carry this bacterium [43,44]. As of yet, there are no studies evaluating the influence of *Wolbachia* on arbovirus transmission in *Culex modestus*, or on USUV transmission in any mosquito species.

The aims of our study were to determine the vector competence of Belgian *Culex* mosquitoes to WNV and USUV and investigate if the presence of *Wolbachia* confers protection against transmission. We captured female *Culex* mosquitoes from urban and peri-urban sites and identified them based on morphology, molecular identification, and DNA barcoding. Next, captured mosquitoes were fed an infectious bloodmeal containing either WNV or one of two different USUV strains to determine infection, dissemination, and transmission rates as well as transmission efficiency. Finally, we determined the prevalence of *Wolbachia* in the mosquitoes that took an infectious bloodmeal.

## Methods

### Mosquitoes

*Culex* mosquitoes were collected from June–September 2022 in Leuven, Flemish Brabant, Belgium (Fig 1). Collections took place interchangeably between an urban habitat (The Botanical Garden of Leuven, N 50° 52'41, E 4° 41'21) and a peri-urban habitat (Arenberg Park, N 50° 51'46, E 4° 41'01). Adult mosquitoes were captured using BG Sentinel traps (Biogents AG, Regensburg, Germany) baited with dry ice for constant CO<sub>2</sub> release and a sachet of BG-Sweet-scent (Biogents AG, Regensburg, Germany) to imitate the scent of human skin. Traps were placed in dispersed locations at either habitat in the late afternoon to allow the capture of free-flying mosquitoes overnight. Trapped mosquitoes were collected the following morning and transported to an insectary facility for sorting. Mosquitoes were anaesthetized over dry ice and identified morphologically to the *Culex* genus level. The sex and feeding condition (unfed/ gravid/blood-fed) of mosquitoes were determined based on morphological cues. Females were placed in 32.5 cm<sup>3</sup> BugDorm cages (MegaView Science Co., Ltd., Taichung, Taiwan) with access to 10% sucrose *ad libitum* on cotton pledgets. The cages were kept for up to one week in

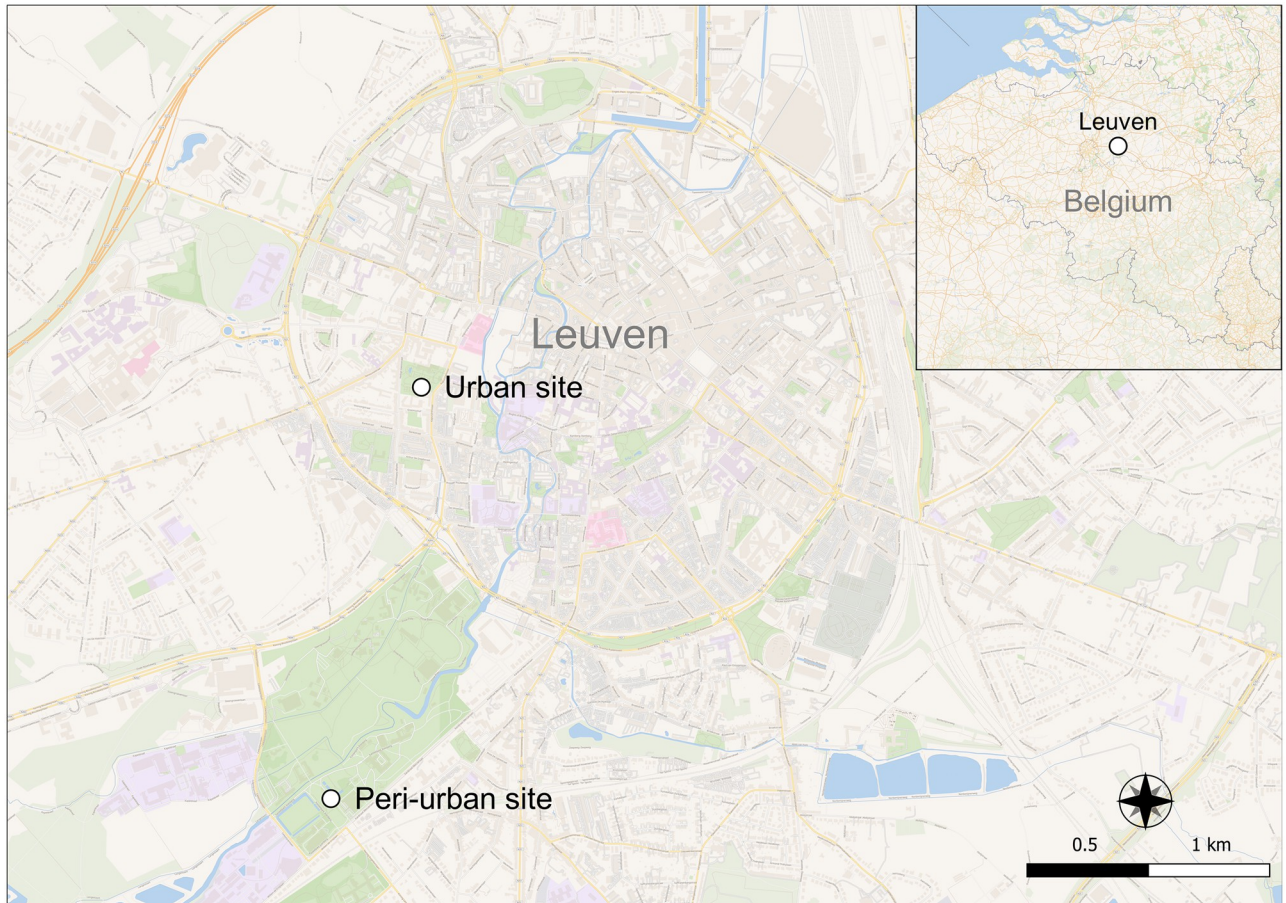

**Fig 1. Urban and peri-urban field collection sites in Leuven, Flemish Brabant, Belgium.** Map made using QGIS v3.18.3 [QGIS Development Team (2021). QGIS Geographic Information System. Open Source Geospatial Foundation Project. <http://qgis.osgeo.org>]. Open map data was obtained from OpenStreetMap contributors through the Wikimedia Commons unlabeled layer (accessed: 14 July 2022).

<https://doi.org/10.1371/journal.pntd.0011649.g001>

an incubator set to 25°C and 70% relative humidity (RH) with a photoperiod of 16:8 light:dark hours.

### Cell lines & virus stocks

The African green monkey kidney cells Vero (ATCC CCL-81) and Vero E6 (ATCC CRL-1586) were used to produce WNV and USUV stocks, respectively. Cells were maintained in Minimum Essential Medium (Gibco, New York, USA) supplemented with 10% fetal bovine serum (FBS). Baby hamster kidney (BHK) cells (ATCC CCL-10) were used for plaque assays, maintained in Dulbecco's Modified Eagle Medium (DMEM) with 10% FBS.

A WNV lineage 2 strain (EMC/WNV/20TV2584/NL) was obtained from the European Virus Archive -Global (EVAg). This strain was isolated in 2020 from the common chiffchaff (*Phylloscopus collybita*) in Utrecht, the Netherlands. Vero cells were used to produce a WNV passage 4 stock for mosquito infections. Two USUV strains were used in this study: USUV/SE/17 Europe 3 lineage (USUV EU, Genbank: MK230892) and the USUV/GR/17 Africa 3 lineage (USUV AF, Genbank: MK230891) [9]. Both strains were isolated in 2017 from Eurasian blackbirds (*Turdus merula*) in the province of Liège, Belgium. USUV stocks for mosquito infections were produced on Vero E6 cells after 4–6 passages. These viruses were selected as



WNV lineage 2 was the dominant lineage in the Netherlands and Germany in recent years [45] and both USUV Europe and Africa lineages circulate in Belgium [9].

### Oral infection

Batches of unfed female mosquitoes were placed in paper cups and transported to a Biosafety Level 3 facility. Females were sugar-starved from 12–48 hours prior to blood-feeding and kept in an incubator maintained at 25°C and 70% RH without light, to simulate nighttime. During the evening, a Hemotek feeding system (Hemotek, Blackburn, UK) was used to deliver an infectious bloodmeal consisting of a 2:1 mixture of chicken blood and FBS, 5 mM adenosine triphosphate (ATP), and virus stock. The final infectious titer in the bloodmeal was  $1.0 \times 10^7$  TCID<sub>50</sub>/ml WNV or USUV, representative of viremic titers in infected birds [46]. Females were allowed to feed for maximum 1 hour in the dark incubator, after which mosquitoes were sedated and sorted over dry ice. Blood-fed and unfed females were separated into individual cardboard cups and provided with 10% sucrose solution *ad libitum* in an incubator maintained at 25°C and 70% RH and a photoperiod of 16:8 light:dark hours [46]. Blood-fed females were held for an incubation period of 14 days, while unfed females were kept until the following oral infection. Unfed females that did not feed during a second (identical) feeding attempt were safely discarded.

### Salivation & dissection

Mosquitoes were sugar-starved 24 hours prior to salivation. At 14 days post-infection, mosquitoes were sedated over dry ice and their wings and legs were removed using forceps. The wings and legs of each mosquito were placed in 300 µl of phosphate buffered saline (PBS) in homogenate tubes with 2.8 mm Precellys ceramic beads (Bertin Technologies, Montigny-le-Bretonneux, France). To collect saliva, the proboscis of each mosquito was placed for 1–1.5 hours in a 20 µl pipette tip containing a 1:1 mixture of FBS and 50% sucrose solution [26]. Each saliva sample was then diluted in an Eppendorf tube containing 40 µl DMEM with 5% HEPES [26]. The mosquito heads were dissected using fine forceps and placed in the same homogenate tubes as their respective wings and legs. The mosquito bodies were placed in new homogenate tubes containing 600 µl of PBS. Forceps were disinfected between each sample using Virkon S (Lanxess AG, Cologne, Germany) followed by 70% ethanol to prevent cross-contamination. All samples were stored at -80°C until further use.

### Infection assessment

The presence of infectious virus in mosquitoes was determined by plaque assay. Mosquito bodies were homogenized using a Precellys Evolution homogenizer at 4,500 rpm for 1 min. The homogenate was centrifuged at 13,000 rpm for 1 min (MegaStar 1.6R, VWR International, Radnor, USA) and the supernatant was transferred to an Eppendorf tube with a 0.8 µm filter and filtered at 13,000 rpm for 3 minutes. Mosquito heads were homogenized at 6,800 rpm for 1 min. These homogenates were spun down for 1 min at 8,000 rpm and the supernatants were filtered through a 0.8 µm filter at 10,000 rpm for 2 minutes. The body samples were processed differently from the head samples for use in a separate study with a different homogenization and centrifugation protocol. The head or body filtrates and the saliva suspensions were added to individual wells of a 24-well plate pre-seeded with BHK cells in DMEM with 2% FBS and 1% 100 U/ml penicillin & streptomycin (PenStrep). After 2 hours of incubation at 37°C, the inoculum from the wells was removed and replaced with 0.8% carboxymethylcellulose (CMC) agar. After 3 days (for saliva samples) or 5 days (for the body and head, wing, and leg samples) of incubation at 37°C, the cells were fixed with 3.6% paraformaldehyde and dyed with crystal

violet to observe plaques. Saliva samples were incubated for 3 days, allowing for smaller plaques that are more easily countable to calculate plaque forming units (PFU) per saliva sample.

The presence or absence of WNV or USUV RNA in the bodies and head, wings and legs was confirmed using qRT-PCR. RNA extraction was performed using the NucleoSpin RNA Virus Kit (Macherey-Nagel, Düren, Germany) following the manufacturer's instructions. WNV detection was performed by qRT-PCR amplifying the 3'UTR region using a primer pair and probe described elsewhere [47] with the probe modified to a double-quenched probe (5'-6-FAM/CTCAACCCC/ZEN/AGGAGGACTGG-IABkFQ-3'; Integrated DNA Technologies, Coralville, USA). For each reaction, a 20 µl mixture containing 3 µl of RNA was prepared using the Low ROX One-Step qRT-PCR 2X MasterMix kit (Eurogentec, Seraing, Belgium) following the manufacturer's instructions. The cycle program included reverse transcription (48°C, 30 minutes) and incubation (95°C, 10 minutes) followed by 40 amplification cycles with denaturation (95°C, 15 seconds) and annealing (55°C, 1 minutes) steps. A qRT-PCR for detection of the USUV NS5 gene was performed using primers designed previously [48] and a modified probe sequence (5'-FAM-TGGGACACCCGGATAACCAGAG-TAMRA-3'). For each reaction, a 25 µl reaction mixture with 3 µl of RNA was prepared using the same kit and cycle conditions described above, with the exception of a 60°C annealing temperature [48]. The WNV and USUV genome copies per sample were quantified using dsDNA gBlocks (Integrated DNA Technologies Inc., Coralville, USA). The gBlocks were used to create a standard curve for absolute quantification of the target DNA with the QuantStudio Design & Analysis software (Thermo Fisher Scientific, Waltham, USA).

### Species identification

DNA extraction of mosquito bodies was performed using the QIAmp DNA Mini Kit (Qiagen, Hilden, Germany) following the manufacturer's instructions. The subspecies *Culex p. pipiens*, *Culex p. molestus*, and *Culex pipiens-molestus* hybrids were distinguished by a duplex qRT-PCR targeting the CQ11 microsatellite region. The primer pair was universal to both biotypes and hybrids [49] while the probes were biotype-specific to either *Culex p. pipiens* [49] or *Culex p. molestus* [50]. Hybrid *Culex pipiens-molestus* were detected by the presence of amplification curves from both probes. A 25 µl reaction volume was prepared for each reaction using the Low ROX One-Step qRT-PCR 2X MasterMix kit (Eurogentec, Seraing, Belgium) following the manufacturer's instructions. The cycle conditions included an initial denaturation step at 95°C for 10 minutes, 40 cycles of denaturation at 94°C for 40s, elongation at 48°C for 1 minute, and extension at 72°C for 1 minute, and a final hold stage at 72°C for 2 minutes.

Other species were identified by sequencing the cytochrome oxidase 1 (COX1) mitochondrial gene. From the DNA extractions, a 710 bp region was amplified by PCR using previously described primers [51] and the KAPA HiFi HotStart ReadyMix PCR Kit (Roche, Basel, Switzerland) following the manufacturer's instructions. The PCR product was run on a 2% agarose gel using gel electrophoresis and the band was purified with the Wizard SV Gel and PCR Clean-Up System (Promega, Madison, USA). Samples were submitted to Macrogen Europe (Amsterdam, the Netherlands) for Sanger sequencing. The obtained sequences were trimmed and assembled with BioEdit v7.2.5 to produce a single consensus sequence per mosquito. Using NCBI BLASTn, the consensus sequences were compared to the standard nt database to identify the closest related hits with >99% sequence similarity.

### Wolbachia detection

The presence of *Wolbachia* was detected using PCR on DNA extracts of mosquito bodies. The universal *Wolbachia* primers 81F and 691R amplifying the *wsp* gene were used for general

detection of supergroups A and B, as described elsewhere [52]. GoTaq Green Master Mix (Promega) was used following the manufacturer's protocol to prepare a 20  $\mu$ L reaction mix containing 0.5  $\mu$ M of each primer and 5  $\mu$ L of template DNA. The thermocycler conditions were: initial denaturation at 95°C for 2 minutes; 35 cycles of denaturation at 95°C for 45 seconds, annealing at 50°C for 2 minutes, and extension at 72°C for 1 minute; and a final extension step at 72°C for 5 minutes. To identify *Wolbachia* belonging to the *wPip* strain (supergroup B), the primers wPF and wPR were used as described elsewhere [53]. The reaction mix and PCR program were the same as described above except an annealing temperature of 60°C was used instead. Amplified products were electrophoresed on a 2% agarose gel. A subset of PCR fragments was purified with the Wizard SV Gel and PCR Clean-Up System and sequenced by MacroGen Europe to confirm the correct amplification target.

### Data analysis & presentation

All figures and statistical analyses were generated with GraphPad Prism v9.5.1 (GraphPad Software, San Diego, California USA). Infection rate (IR) was calculated as the proportion of blood-fed mosquitoes with infectious virus present in the body; dissemination rate (DR) was the proportion of mosquitoes with a positive infection in the body that also had infectious virus in the head, wings and legs; and transmission rate (TR) was the proportion of mosquitoes with a disseminated infection that also had infectious virus present in the saliva. Transmission efficiency was calculated as the proportion of mosquitoes with infectious virus in the saliva over the total number of blood-fed mosquitoes tested. Viral genome copies were statistically compared using the Mann-Whitney *U* test and the effect of *Wolbachia* infection on virus infection rate was determined using the Fisher's exact test. A p-value of <0.05 was considered statistically significant. The raw data used to produce Figs 2–6 and S1 are available online at The Open Science Framework (DOI [10.17605/OSF.IO/M2N8Y](https://doi.org/10.17605/OSF.IO/M2N8Y)).

## Results

### Mosquito collections in Leuven, Belgium

A total of 1,951 *Culex* mosquitoes were captured over 166 trap nights (Fig 2A and 2B). Most mosquitoes were collected at the urban site ( $n = 13$  mosquitoes/trap night) followed by the

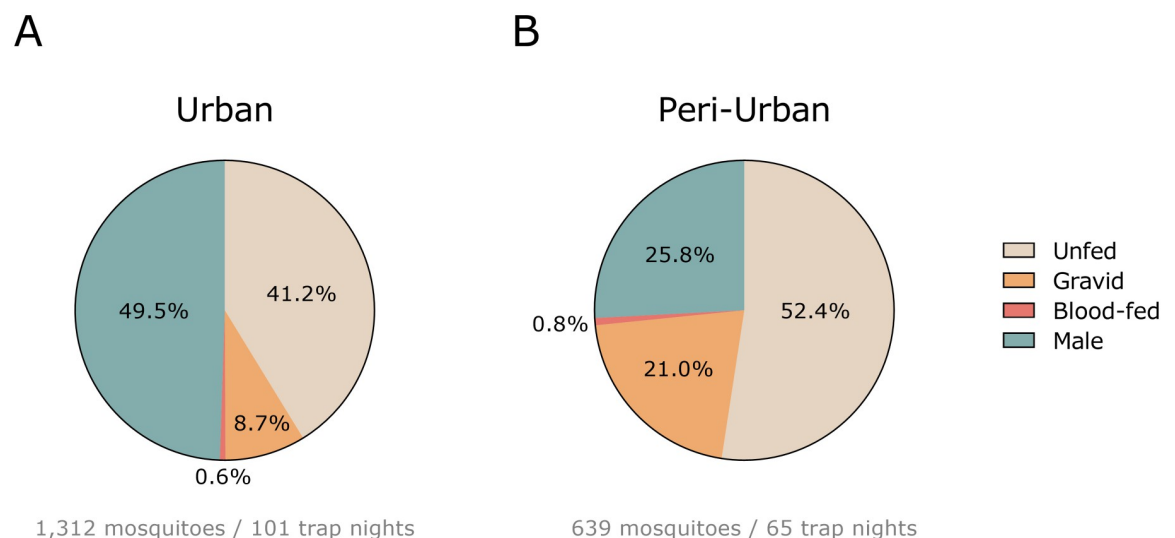

**Fig 2. Adult *Culex* mosquitoes captured at the urban (A) and peri-urban (B) sites in Leuven, Belgium.**

<https://doi.org/10.1371/journal.pntd.0011649.g002>

peri-urban site (n = 10 mosquitoes/trap night). The majority of all captured mosquitoes were female (58.3%, n = 1,137), of which 44.9% (n = 876) were unfed, 12.7% (n = 248) were gravid, and 0.7% (n = 13) were engorged with blood.

### Blood-feeding & species identification

A total of 475 unfed females were offered an infectious bloodmeal containing either WNV (lineage 2, Netherlands 2020), USUV Europe strain (EU, lineage 3, Belgium 2016), or USUV Africa strain (AF, lineage 3, Belgium 2016). The mean blood-feeding rate for each feeding was 20.8% (n = 12 feedings; 95% CI: 10.0–31.7). The blood-fed mosquitoes had a 14-day post-feeding mortality rate of 14.4% (n = 26/180; 95% CI: 3.0–18.8).

Mosquito body, head, wings and legs, and saliva samples from 154 females were harvested at 14 days post-infection (Fig 3). The majority of the blood-fed mosquitoes were identified as *Culex pipiens (p.) pipiens* (90.9%, n = 140), dispersed among the three infection groups. Eleven mosquitoes (7.1%) were identified as *Culex modestus*, belonging to the WNV (n = 6) and USUV AF (n = 5) infection groups. No *Culex modestus* were present in the group fed with USUV EU. The remaining mosquitoes were identified as *Culex p. molestus* (0.6%, n = 1) in the WNV group, and a *Culex pipiens-molestus* hybrid (0.6%, n = 1) and *Culex torrentium* (0.6%, n = 1) in the USUV EU group.

### Vector competence

Belgian *Culex p. pipiens* were found to transmit WNV, but not USUV (Fig 4A). The infection rate for WNV-fed mosquitoes was 10.6% in the bodies (n = 5/47), followed by 40% dissemination to the head, wings, and legs (n = 2/5) and 100% transmission in the saliva (n = 2/2). The overall WNV transmission efficiency for *Culex p. pipiens* was 4.3% (n = 2/47). For *Culex p. pipiens* fed with USUV EU, 12.5% had a positive infection in the body (n = 7/56), but there was no subsequent disseminated infection (n = 0/7). The infection rate for *Culex p. pipiens*

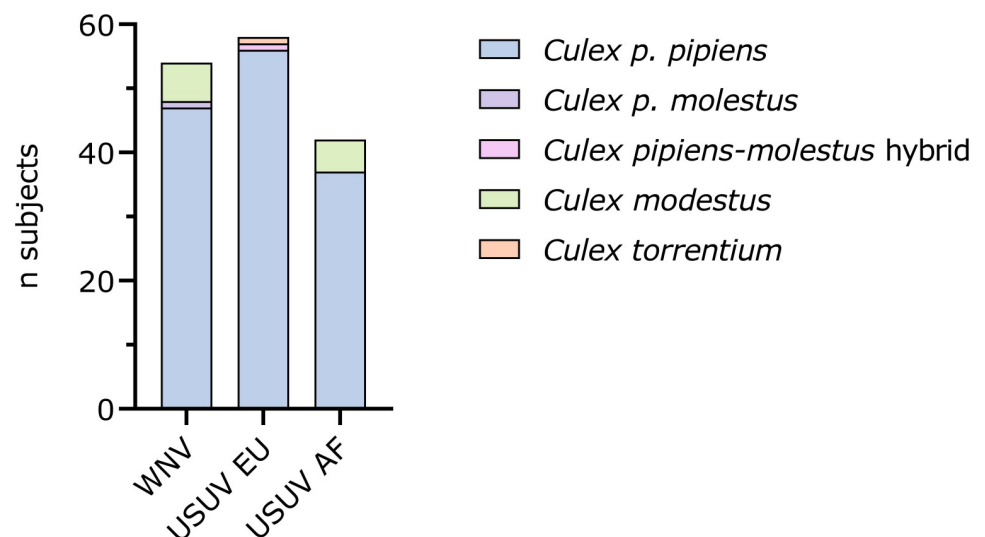

**Fig 3. *Culex* species identification by virus infection group.** *Culex* mosquitoes were identified morphologically to the genus level, after which *Culex pipiens (p.)* biotypes (*pipiens*, *molestus*, *pipiens-molestus* hybrids) were identified by qRT-PCR while other species (*Culex torrentium* and *Culex modestus*) were identified by sequencing the cytochrome oxidase I (COX1) gene.

<https://doi.org/10.1371/journal.pntd.0011649.g003>



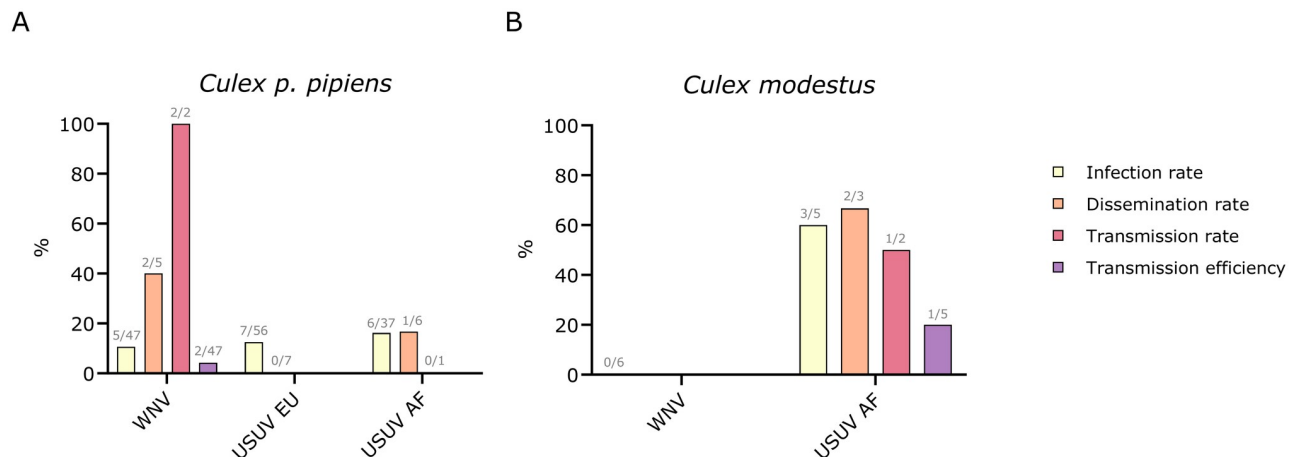

**Fig 4. Vector competence of *Culex pipiens* (*p. pipiens*) (A) and *Culex modestus* (B) for WNV and USUV.** The bars represent the rates of infection in the body (yellow), disseminated infection to the head, wings, and legs (orange), transmission potential in the saliva (red), and overall transmission efficiency (purple), determined by plaque assay. Grey labels above the bars indicate the number of positive mosquitoes over the total number of mosquitoes.

<https://doi.org/10.1371/journal.pntd.0011649.g004>

blood-fed with USUV AF was 16.2% ( $n = 6/37$ ) with a dissemination rate of 16.7% ( $n = 1/6$ ), but there was no detectable virus in the saliva ( $n = 0/1$ ).

Interestingly, *Culex modestus* was the only species able to transmit USUV (Fig 4B). A positive USUV AF infection was observed in the bodies of 60% of *Culex modestus* ( $n = 3/5$ ), with 66.7% dissemination to other organs ( $n = 2/3$ ) and 50% transmission from saliva ( $n = 1/2$ ). The overall transmission efficiency for USUV AF in *Culex modestus* was therefore 20% ( $n = 1/5$ ). In contrast, there was no infection in *Culex modestus* that received a bloodmeal containing WNV ( $n = 0/6$ ). *Culex p. molestus* was negative for WNV ( $n = 0/1$ ), and the *Culex pipiens-molestus* hybrid ( $n = 0/1$ ) and *Culex torrentium* ( $n = 0/1$ ) were both negative for USUV EU.

### Virus quantification

The median WNV titer in *Culex p. pipiens* was  $5.8 \times 10^7$  (95% CI:  $3.27 \times 10^6$ – $3.64 \times 10^8$ ) and  $3.46 \times 10^7$  (95% CI:  $1.31 \times 10^7$ – $5.60 \times 10^7$ ) genome copies per body and head, wings, and leg samples, respectively (Fig 5A and 5B). *Culex p. pipiens* infected with USUV EU had a median titer of  $3.43 \times 10^6$  (95% CI:  $8.87 \times 10^5$ – $1.47 \times 10^7$ ) genome copies per body, with no quantifiable RNA in the head, wings, and legs. One *Culex p. pipiens* female with a positive plaque assay for the body but no detectable plaques for the head, wings and legs sample had quantifiable USUV AF RNA in the head, wings, and legs ( $2.8 \times 10^3$  genome copies). Including this mosquito, the *Culex p. pipiens* infected with USUV AF had a median body titer of  $3.41 \times 10^6$  (95% CI:  $1.63 \times 10^6$ – $1.37 \times 10^7$ ) genome copies and median head, wings, and legs titer of  $6.06 \times 10^5$  (95% CI:  $2.80 \times 10^3$ – $1.21 \times 10^6$ ) genome copies. There was no significant difference in viral genome copies between *Culex p. pipiens* bodies infected with USUV EU or USUV AF ( $p = 0.6282$ ), but WNV-infected bodies had significantly higher genome copies than those infected with USUV EU ( $p = 0.0303$ ) or USUV AF ( $p = 0.0303$ ). The WNV and USUV AF titers in *Culex p. pipiens* head, wings, and legs were not significantly different ( $p = 0.3333$ ).

*Culex modestus* infected with USUV AF (Fig 5C and 5D) had a median titer of  $1.33 \times 10^7$  (95% CI:  $8.63 \times 10^4$ – $7.05 \times 10^7$ ) genome copies in the body and a median titer of  $1.25 \times 10^6$  (95% CI:  $6.84 \times 10^5$ – $1.81 \times 10^6$ ) genome copies in the head, wings, and legs. There was no significant difference in USUV AF genome copies between the bodies ( $p = 0.71$ ) or head, wings, and legs ( $p = >0.99$ ) of infected *Culex p. pipiens* and *Culex modestus* (S1 Fig).

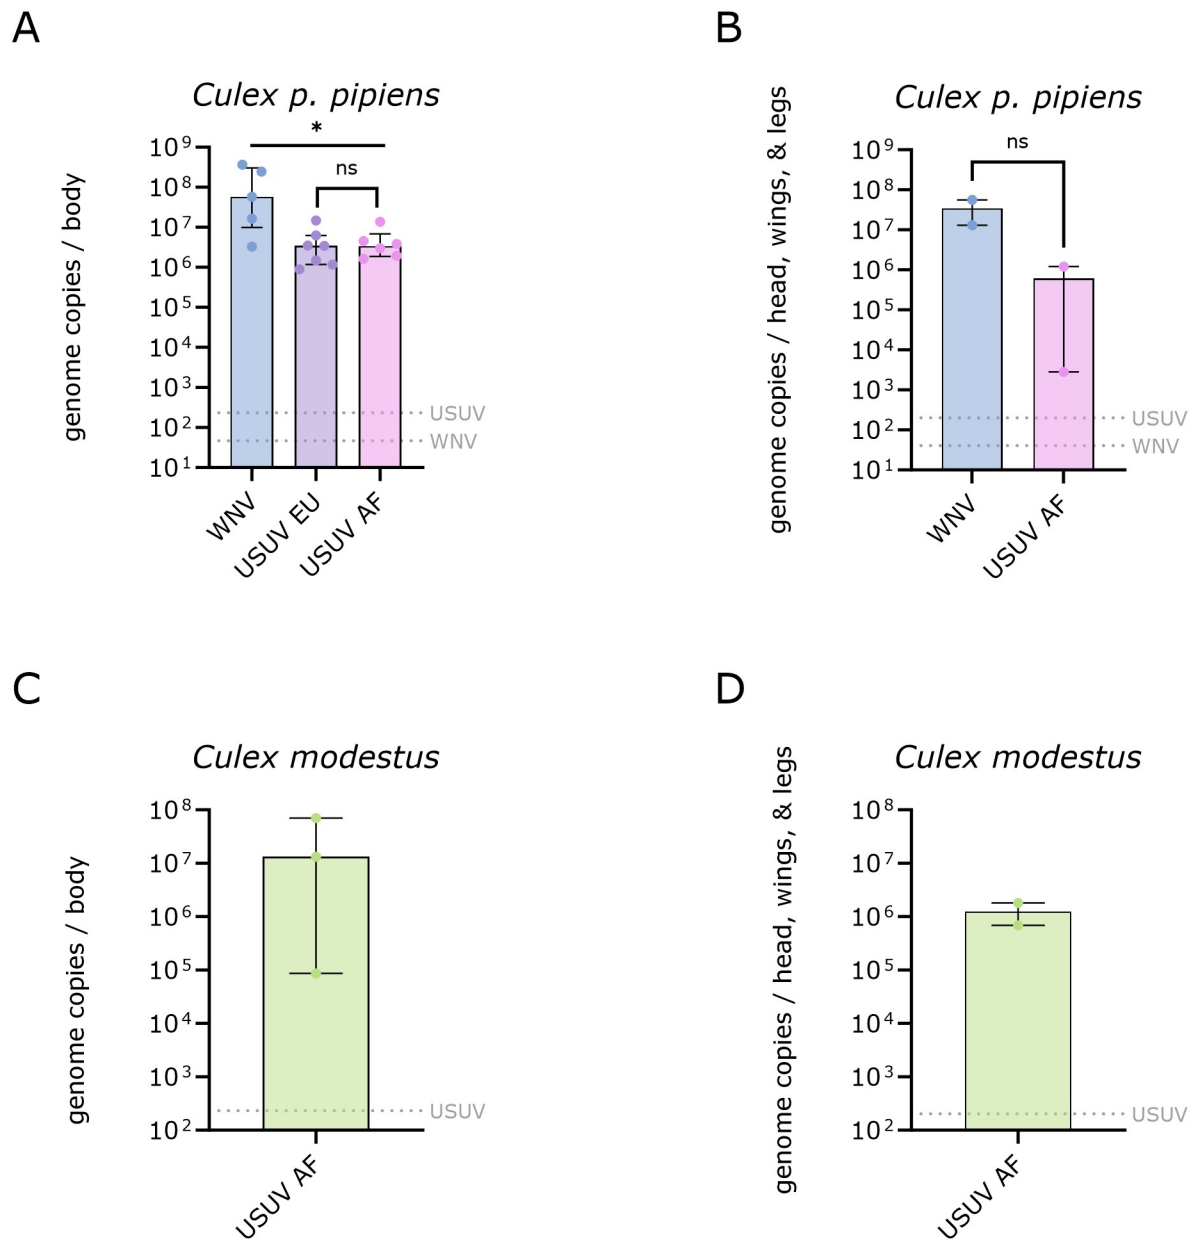

**Fig 5. Viral genome copies in the bodies and head, wings, and legs of *Culex pipiens* (*p.*) *pipiens* (A-B) and *Culex modestus* (C-D).** The bars represent the median viral genome copies  $\pm$  interquartile range; the grey dotted lines represent the limit of detection (LOD) of the qRT-PCR assays used. Statistical analysis was performed with the Mann-Whitney *U* test; the asterisk represents a *p*-value of  $<0.05$ ; ns: non-significant.

<https://doi.org/10.1371/journal.pntd.0011649.g005>

The median infectious titer in *Culex p. pipiens* with detectable WNV in the saliva was 305 (95% CI: 0.00–1.45  $\times 10^3$ ) PFU per sample (Fig 6). The single *Culex modestus* with a transmissible USUV AF infection had 72 PFU per sample.

### **Wolbachia infection of Belgian *Culex* mosquitoes**

All *Culex p. pipiens* body samples ( $n = 139$ ), except for one female blood-fed with WNV but with no detectable WNV infection in the body or head, wings, and legs, were positive for the

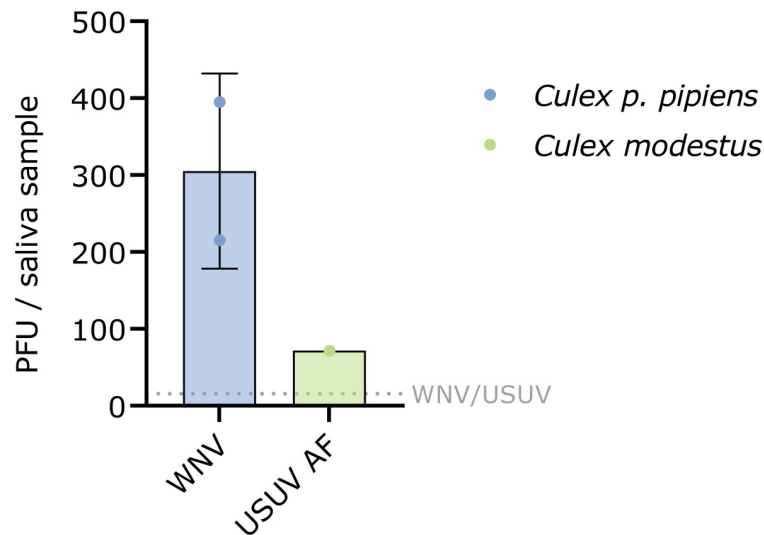

**Fig 6. Infectious titer per saliva sample of *Culex pipiens* (*p.*) *pipiens* and *Culex modestus*.** Infectious virus titers were determined by plaque assay (PFU: plaque forming units). The bars show the median  $\pm$  interquartile range; the grey dotted line represents the limit of detection (LOD) of the plaque assay.

<https://doi.org/10.1371/journal.pntd.0011649.g006>

*Wolbachia wsp* gene (Table 1). A subset of *Wolbachia*-positive *Culex p. pipiens* body samples that were either infected ( $n = 18$ ) or non-infected ( $n = 18$ ) with WNV or USUV were investigated for the presence of the *wPip* strain (supergroup B), of which all were found positive for this strain (S1 Table). All *Culex modestus* mosquitoes ( $n = 11$ ) were negative for *Wolbachia*, regardless of their infection status for USUV AF. The individual *Culex p. molestus* and *Culex pipiens-molestus* hybrid were both infected with *Wolbachia*, whereas the single *Culex torrentium* was not. There was no correlation between *Wolbachia* infection on WNV or USUV AF infection, dissemination, or transmission rates in *Culex p. pipiens* ( $p = >0.99$ ) or *Culex modestus* ( $p = >0.99$ ), respectively (S2 Table).

## Discussion

We present the first report that field-collected Belgian *Culex* mosquitoes can transmit WNV and USUV in a laboratory setting. Interestingly, despite *Culex p. pipiens* being generally considered a USUV vector, they were unable to transmit USUV from two different strains isolated in Belgium (Europe lineage 3 and Africa lineage 3). This is in line with other studies on field-collected *Culex pipiens* s.l. mosquitoes. In a UK surveillance study, no USUV RNA could be detected in pooled samples comprising 4,800 *Culex pipiens* s.l. mosquitoes [54]. A field study on French *Culex pipiens* s.l. also observed a low infection rate for USUV EU lineage 3 (1.4%) while infection was much higher for WNV lineage 1 (38.7%) [55]. Furthermore, a study on American *Culex p. pipiens* found that they were unable to transmit USUV isolated from the Netherlands [56].

**Table 1. Prevalence of *Wolbachia* infection per species by detection of the *wsp* gene.**

| Species                       | % <i>wsp</i> positive (n) | % <i>wsp</i> negative (n) |
|-------------------------------|---------------------------|---------------------------|
| <i>Culex p. pipiens</i>       | 99.3 (139)                | 0.7 (1)                   |
| <i>Culex modestus</i>         | 0                         | 100 (11)                  |
| <i>Culex p. molestus</i>      | 100 (1)                   | 0                         |
| <i>Culex pipiens-molestus</i> | 100 (1)                   | 0                         |
| <i>Culex torrentium</i>       | 0                         | 100 (1)                   |

<https://doi.org/10.1371/journal.pntd.0011649.t001>

Other investigations of USUV in European *Culex p. pipiens* were performed with laboratory-colonized mosquitoes [24,25] or did not specify the *pipiens* and *modestus* biotypes [7,15,27,57–73]. It is therefore possible that the true USUV vector competence of *Culex p. pipiens* is significantly lower in nature than what is measured in laboratory colonies. The midgut escape barrier and salivary gland infection barrier may be key in preventing USUV transmission in *Culex p. pipiens*, since USUV EU and AF were able to establish in the midgut and/or disseminate to the rest of the mosquito but not reach the salivary glands. On the other hand, Belgian *Culex p. pipiens* proved to be efficient vectors of WNV. We observed a low WNV infection rate (10.6%), a high transmission rate (100.0%), but low transmission efficiency (4.3%). Our results are consistent with another study from the Netherlands which also observed a low infection rate (up to 35.7%) and low transmission efficiency (up to 7.1%) [20]. In contrast, two studies from Germany obtained high infection and transmission rates (up to 76.9% infection, up to 96.0% dissemination, and up to 80.0% transmission rates) [11,21]. It is possible that the observed differences between vector competence studies may be attributed to mosquito genetics, length of virus incubation after an infectious bloodmeal, the virus strains used, and/or other methodological factors.

In contrast to the lack of USUV transmission by *Culex p. pipiens*, the *Culex modestus* captured in this study were competent vectors for USUV AF. This result was unexpected given that the sample size of *Culex modestus* in the USUV AF group was low ( $n = 5$ ). The small sample size, especially compared to the number of *Culex p. pipiens* tested in this study ( $n = 140$ ), suggests that *Culex modestus* is a highly efficient USUV AF vector. USUV RNA has previously been detected in pooled field-captured *Culex modestus* from the Czech Republic [14] but, to our knowledge, our study is the first to demonstrate USUV vector competence in *Culex modestus* using live mosquitoes. Conversely, no *Culex modestus* in the WNV-fed group ( $n = 6$ ) developed a WNV infection. There is substantial evidence of WNV RNA detected in field-captured *Culex modestus* from other countries [14,27–32], and there is data on the vector competence of laboratory colonies showing that *Culex modestus* is an efficient WNV vector [12,33]. Therefore, it is possible that our sample size was not high enough to obtain WNV-infected *Culex modestus*. More research is needed to fully understand the vector competence and vectorial capacity of this overlooked, but potentially highly dangerous, mosquito vector.

The viral RNA copies quantified in the mosquitoes in this study are consistent with other reports that measured viral loads in *Culex p. pipiens* infected with WNV [55,74] and USUV [74]. There was no significant difference in *Culex p. pipiens* body titers between USUV EU and USUV AF, but only USUV AF was able to disseminate to the head, wings, and legs. Similarly, there was no significant difference between USUV AF genome copies between *Culex p. pipiens* and *Culex modestus* bodies or heads, yet *Culex modestus* was the only species with detectable USUV AF in the saliva. It has been demonstrated elsewhere that RNA copies do not necessarily correlate with the quantity of infectious virus or the ability to establish persistent infection or dissemination in the mosquito [75]. Our results suggest that the USUV AF lineage 3 replicates more efficiently in *Culex modestus* than in *Culex p. pipiens*. Furthermore, USUV AF may be more efficient than USUV EU in bypassing the midgut barrier and/or host immune response of *Culex p. pipiens*. These findings are especially interesting, as most cases of USUV isolated from avian samples in Belgium belonged to the EU lineage [9]. Furthermore, in a study using the same USUV strains as this study, the EU strain produced higher quantities of viral RNA than the AF strain when inoculated in chicken embryo-derived cells [76]. More research is thus needed to understand the vector competence of *Culex modestus* to USUV EU strains.

As research interest in *Wolbachia* continues to grow due to its success as an arbovirus control strategy, we determined the prevalence of *Wolbachia* infection in the mosquitoes challenged in this study. Almost all *Culex p. pipiens* had a *Wolbachia* infection belonging to the *wPip* strain (99.3%), consistent with other European studies [37,42]. The only *Culex p. pipiens*



without *Wolbachia* was in the WNV-fed group with no detectable WNV infection. The ability of *Culex p. pipiens* to be a vector in this study was most likely not linked to the strain of *Wolbachia* that they carried, as all tested mosquitoes carried the same *wPip* strain regardless of their WNV or USUV midgut infection status (100%,  $n = 36/36$ ). We did not find a statistically significant effect of *Wolbachia* infection on the ability of WNV or USUV to replicate in *Culex p. pipiens*; however, we emphasize that the number of *Wolbachia*-negative mosquitoes was too low to reach an accurate conclusion. A limitation to our study is that we did not quantify *Wolbachia* loads; however, a study on *Culex p. pipiens* from Germany found no correlation between *Wolbachia* levels and WNV infection [37]. Of the *Culex modestus* identified in this study, all were negative for *Wolbachia*. In contrast to our findings, other studies have found *Wolbachia* in *Culex modestus* from Italy (prevalence rate unknown) [43] and Eastern Europe (7% prevalence) [44]. However, our sample size was likely too low to reach the conclusion that Belgian *Culex modestus* do not carry *Wolbachia*. As almost all *Culex p. pipiens* were positive for *Wolbachia* but all *Culex modestus* were negative, we can presume that the probability of acquiring and maintaining *Wolbachia* is species-dependent. It would be interesting to investigate if the presence of *Wolbachia* in *Culex modestus*, whether acquired naturally or artificially, plays a role in their vector competence.

In this study, field-captured mosquitoes were the preferred model of choice to study vector competence over laboratory colonies. Multiple intrinsic and extrinsic factors can influence the fitness and vector competence of mosquitoes, such as genetic diversity, age, parity rate, the microbiome, innate immunity, climate, and the environment [77]. It has also been shown that vector competence can differ significantly between wild and laboratory-colonized mosquitoes of the same species [20,78]. Despite the advantages of using field mosquitoes over colonies, there are several limitations, such as the dependence on climate, need for species identification, mosquito loss or damage during collections, and difficulty in achieving high mosquito numbers. A limitation of our study was that all *Culex* species were pooled for oral infections prior to species identification, which is why we did not obtain any *Culex modestus* fed with USUV EU. However, despite the evident drawbacks, we argue that field mosquitoes provide a more accurate measure of vector competence because they represent the natural vector population.

To date, blood and organ donor screenings for WNV take place in endemic European countries, but for the prevention of WNV and USUV transmission by mosquitoes there is little routine vector control in place. In areas where competent vectors are present, it is important to determine the risk of transmission by measures of vector competence and vectorial capacity to anticipate and prepare for potential outbreaks. We present the first evidence that *Culex* mosquitoes from Belgium can transmit WNV and USUV. *Culex p. pipiens* was capable of transmitting WNV, whereas *Culex modestus* was shown to be an efficient vector for USUV. More research is needed to understand if *Culex modestus* can transmit other USUV lineages, such as EU lineage 3, and if *Wolbachia* can influence the vector competence of *Culex modestus*. As Belgium lies between countries with prior human WNV cases and is known to be endemic for USUV, the presence of competent mosquito vectors for both WNV and USUV could eventually lead to human cases in Belgium. Improved mosquito surveillance and arbovirus prevention measures in Belgium are therefore highly recommended.

## Supporting information

**S1 Fig. Comparison of USUV AF genome copies in *Culex p. pipiens* and *Culex modestus*.** USUV AF genome copies were determined by qRT-PCR in individual bodies (A) and heads (B). The bars show the median viral genome copies  $\pm$  interquartile range; the grey dotted lines represent the limit of detection (LOD) of the qRT-PCR assays used. Statistical analysis was

performed with the Mann-Whitney  $U$  test.  
(DOCX)

**S1 Table. Detection of the *Wolbachia wPip* strain in *Wolbachia*-infected *Culex p. pipiens* by virus infection status in the mosquito midgut.**

(DOCX)

**S2 Table. Impact of *Wolbachia* infection on virus infection, dissemination, and transmission by species.** The effect of *Wolbachia* infection on arbovirus infection rate (IR), dissemination rate (DR), and transmission rate (TR) were determined by the Fisher's exact test. NS: non-significant.

(DOCX)

## Acknowledgments

We would like to thank Prof. Mutien Garigliany from the University of Liège for providing us with the Belgian USUV stocks. We would like to recognize Jan Vandyck and the kind workers at the Botanical Garden (Kruidentuin) of Leuven as well as Marc Leroy and members of the Space and Real Estate Division at KU Leuven (Arenberg Park) for kindly allowing us to set mosquito traps. We would like to thank Dr. Suzanne Kaptein and Elke Maas for sharing their WNV qRT-PCR protocol with us, and we thank Joske Depovere for her assistance with the mosquito collections. Finally, we thank Prof. Johan Neyts for allowing us to use his laboratory space and equipment.

## Author Contributions

**Conceptualization:** Jelle Matthijnsens, Leen Delang.

**Data curation:** Alina Soto.

**Formal analysis:** Alina Soto.

**Funding acquisition:** Jelle Matthijnsens, Leen Delang.

**Investigation:** Alina Soto, Lander De Coninck, Ann-Sophie Devlies, Celine Van De Wiele, Ana Lucia Rosales Rosas.

**Methodology:** Alina Soto, Lanjiao Wang, Jelle Matthijnsens, Leen Delang.

**Resources:** Jelle Matthijnsens, Leen Delang.

**Software:** Alina Soto.

**Supervision:** Leen Delang.

**Validation:** Jelle Matthijnsens, Leen Delang.

**Visualization:** Alina Soto.

**Writing – original draft:** Alina Soto.

**Writing – review & editing:** Lander De Coninck, Ann-Sophie Devlies, Celine Van De Wiele, Ana Lucia Rosales Rosas, Lanjiao Wang, Jelle Matthijnsens, Leen Delang.

## References

1. European Centre for Disease Prevention and Control. Weekly updates: 2022 West Nile virus transmission season n.d. <https://www.ecdc.europa.eu/en/west-nile-fever/surveillance-and-disease-data/disease-data-ecdc> (accessed May 5, 2023).

2. European Centre for Disease Prevention and Control. Historical data by year—West Nile virus seasonal surveillance n.d. <https://www.ecdc.europa.eu/en/west-nile-fever/surveillance-and-disease-data/historical> (accessed May 5, 2023).
3. Barzon L. Ongoing and emerging arbovirus threats in Europe. *Journal of Clinical Virology* 2018; 107:38–47. <https://doi.org/10.1016/j.jcv.2018.08.007> PMID: 30176404
4. Sikkema RS, Schrama M, Van Den Berg T, Morren J, Munger E, Krol L, et al. Detection of west nile virus in a common whitethroat (*curruca communis*) and culex mosquitoes in the Netherlands, 2020. *Eurosurveillance* 2020; 25:1–6. <https://doi.org/10.2807/1560-7917.ES.2020.25.40.2001704> PMID: 33034280
5. Vlaskamp DRM, Thijsen SFT, Reimerink J, Hilken P, Bouvy WH, Bantjes SE, et al. First autochthonous human west nile virus infections in the Netherlands, July to August 2020. *Eurosurveillance* 2020; 25:1–4. <https://doi.org/10.2807/1560-7917.ES.2020.25.46.2001904> PMID: 33213687
6. Kampen H, Tews BA, Werner D. First evidence of west nile virus overwintering in mosquitoes in Germany. *Viruses* 2021; 13. <https://doi.org/10.3390/v13122463> PMID: 34960732
7. Ziegler U, Bergmann F, Fischer D, Müller K, Holicki CM, Sadeghi B, et al. Spread of West Nile Virus and Usutu Virus in the German Bird Population, 2019–2020. *Microorganisms* 2022; 10. <https://doi.org/10.3390/microorganisms10040807> PMID: 35456857
8. Schneider J, Bachmann F, Choi M, Kurvits L, Schmidt ML, Bergfeld L, et al. Autochthonous West Nile virus infection in Germany: Increasing numbers and a rare encephalitis case in a kidney transplant recipient. *Transboundary and Emerging Diseases* 2022; 69:221–6. <https://doi.org/10.1111/tbed.14406> PMID: 34850584
9. Benzarti E, Sarlet ML, Franssen M, Cadar D, Schmidt-Chanasit J, Rivas JF, et al. Usutu Virus Epizootic in Belgium in 2017 and 2018: Evidence of Virus Endemization and Ongoing Introduction Events. *Vector-Borne and Zoonotic Diseases* 2020; 20. <https://doi.org/10.1089/vbz.2019.2469> PMID: 31479400
10. Jansen S, Heitmann A, Lühken R, Leggewie M, Helms M, Badusche M, et al. *Culex torrentium*: A potent vector for the transmission of west nile virus in central Europe. *Viruses* 2019; 11. <https://doi.org/10.3390/v11060492> PMID: 31146418
11. Leggewie M, Badusche M, Rudolf M, Jansen S, Börstler J, Krumkamp R, et al. *Culex pipiens* and *Culex torrentium* populations from Central Europe are susceptible to West Nile virus infection. *One Health* 2016; 2:88–94. <https://doi.org/10.1016/j.onehit.2016.04.001> PMID: 28616480
12. Balenghien T, Vazeille M, Grandadam M, Schaffner F, Zeller H, Reiter P, et al. Vector competence of some French *Culex* and *Aedes* mosquitoes for West Nile Virus. *Vector-Borne and Zoonotic Diseases* 2008; 8:589–95. <https://doi.org/10.1089/vbz.2007.0266> PMID: 18447623
13. Holicki CM, Scheuch DE, Ziegler U, Lettow J, Kampen H, Werner D, et al. German *Culex pipiens* biotype *molestus* and *Culex torrentium* are vector-competent for Usutu virus. *Parasites & Vectors* 2021 13:1 2020; 13:1–10. <https://doi.org/10.1186/s13071-020-04532-1> PMID: 33380339
14. Rudolf I, Bakonyi T, Šebesta O, Mendel J, Peško J, Betášová L, et al. Co-circulation of Usutu virus and West Nile virus in a reed bed ecosystem. *Parasites and Vectors* 2015; 8:1–5. <https://doi.org/10.1186/s13071-015-1139-0> PMID: 26459018
15. Hönig V, Palus M, Kaspar T, Zemanova M, Majerova K, Hofmannova L, et al. Multiple lineages of usutu virus (Flaviviridae, flavivirus) in blackbirds (*turdus merula*) and mosquitoes (*culex pipiens*, *cx. modestus*) in the czech republic (2016–2019). *Microorganisms* 2019; 7. <https://doi.org/10.3390/microorganisms7110568> PMID: 31744087
16. Fros JJ, Miesen P, Vogels CB, Gaibani P, Sambri V, Martina BE, et al. Comparative Usutu and West Nile virus transmission potential by local *Culex pipiens* mosquitoes in north-western Europe. *One Health* 2015; 1:31–6. <https://doi.org/10.1016/j.onehit.2015.08.002> PMID: 28616462
17. Vázquez González A, Ruiz S, Herrero L, Moreno J, Molero F, Magallanes A, et al. West Nile and Usutu viruses in mosquitoes in Spain, 2008–2009. *American Journal of Tropical Medicine and Hygiene* 2011; 85:178–81. <https://doi.org/10.4269/ajtmh.2011.11-0042> PMID: 21734145
18. Wang L, Rosas ALR, Coninck LD, Shi C, Bouckaert J, Matthijnsens J, et al. Establishment of *Culex modestus* in Belgium and a Glance into the Virome of Belgian Mosquito Species. *MSphere* 2021; 6. <https://doi.org/10.1128/mSphere.01229-20> PMID: 33883261
19. De Wolf K, Vanderheyden A, Deblauwe I, Smits N, Gombeer S, Vanslembrouck A, et al. First record of the West Nile virus bridge vector *Culex modestus* Ficalbi (Diptera: Culicidae) in Belgium, validated by DNA barcoding. *Zootaxa* 2021; 4920:131–9. <https://doi.org/10.11646/zootaxa.4920.1.7> PMID: 33756679
20. Koenraad CJM, Möhlmann TWR, Verhulst NO, Spitzen J, Vogels CBF. Effect of overwintering on survival and vector competence of the West Nile virus vector *Culex pipiens*. *Parasites and Vectors* 2019; 12:147. <https://doi.org/10.1186/s13071-019-3400-4> PMID: 30917854

21. Holicki CM, Ziegler U, Răileanu C, Kampen H, Werner D, Schulz J, et al. West Nile virus lineage 2 vector competence of indigenous *Culex* and *Aedes* mosquitoes from Germany at temperate climate conditions. *Viruses* 2020; 12. <https://doi.org/10.3390/v12050561> PMID: 32438619
22. Camp JV, Kolodziejek J, Nowotny N. Targeted surveillance reveals native and invasive mosquito species infected with Usutu virus. *Parasites and Vectors* 2019; 12. <https://doi.org/10.1186/s13071-019-3316-z> PMID: 30665453
23. Jöst H, Bialonski A, Maus D, Sambri V, Eiden M, Groschup MH, et al. Isolation of Usutu virus in Germany. *American Journal of Tropical Medicine and Hygiene* 2011; 85:551–3. <https://doi.org/10.4269/ajtmh.2011.11-0248> PMID: 21896821
24. Hernández-Triana LM, De Marco MF, Mansfield KL, Thorne L, Lumley S, Marston D, et al. Assessment of vector competence of UK mosquitoes for Usutu virus of African origin. *Parasites and Vectors* 2018; 11:381. <https://doi.org/10.1186/s13071-018-2959-5> PMID: 29970149
25. Abbo SR, Visser TM, Koenraadt CJM, Pijlman GP, Wang H. Effect of blood source on vector competence of *Culex pipiens* biotypes for Usutu virus. *Parasites & Vectors* 2021; 14:194. <https://doi.org/10.1186/S13071-021-04686-6> PMID: 33832527
26. Vogels CBF, Fros JJ, Göertz GP, Pijlman GP, Koenraadt CJM. Vector competence of northern European *Culex pipiens* biotypes and hybrids for West Nile virus is differentially affected by temperature. *Parasites & Vectors* 2016; 9:393. <https://doi.org/10.1186/s13071-016-1677-0> PMID: 27388451
27. Mancini G, Montarsi F, Calzolari M, Capelli G, Dottori M, Ravagnan S, et al. Mosquito species involved in the circulation of West Nile and Usutu viruses in Italy. *Veterinaria Italiana* 2017; 53:97–110. <https://doi.org/10.12834/VetIt.114.933.4764.2> PMID: 28675249
28. Nurmakhanov T, Sansyzbaev Y, Atshabar B, Berlin V, Kobzhasarov D, Yeskhozayev O, et al. Phylogenetic Characteristics of West Nile Virus Isolated From *Culex modestus* Mosquitoes in West Kazakhstan. *Frontiers in Public Health* 2021; 8. <https://doi.org/10.3389/fpubh.2020.575187> PMID: 33643981
29. Fyodorova MV, Savage HM, Lopatina JV, Bulgakova TA, Ivaniitsky AV, Platonova OV, et al. Evaluation of Potential West Nile Virus Vectors in Volgograd Region, Russia, 2003 (Diptera: Culicidae): Species Composition, Bloodmeal Host Utilization, and Virus Infection Rates of Mosquitoes. *Journal of Medical Entomology* 2006; 43:552–63. [https://doi.org/10.1603/0022-2585\(2006\)43\[552:eopwnv\]2.0.co;2](https://doi.org/10.1603/0022-2585(2006)43[552:eopwnv]2.0.co;2) PMID: 16739415
30. Rudolf I, Bakonyi T, Šebesta O, Mendel J, Peško J, Betášová L, et al. West Nile virus lineage 2 isolated from *Culex modestus* mosquitoes in the Czech Republic, 2013: expansion of the European WNV endemic area to the North? *Eurosurveillance* 2014; 19:20867. <https://doi.org/10.2807/1560-7917.es2014.19.31.20867> PMID: 25138970
31. Radrova J, Seblova V, Votycka J. Feeding Behavior and Spatial Distribution of *Culex* Mosquitoes (Diptera: Culicidae) in Wetland Areas of the Czech Republic. *Journal of Medical Entomology* 2013; 50:1097–104. <https://doi.org/10.1603/ME13029> PMID: 24180115
32. Crivei LA, Moutailler S, Gonzalez G, Lowenski S, Crivei IC, Porea D, et al. Detection of West Nile Virus Lineage 2 in Eastern Romania and First Identification of Sindbis Virus RNA in Mosquitoes Analyzed using High-Throughput Microfluidic Real-Time PCR. *Viruses* 2023; 15. <https://doi.org/10.3390/v15010186> PMID: 36680227
33. Balenghien T, Vazeille M, Reiter P, Schaffner F, Zeller H, Bicout DJ. Evidence of laboratory vector competence of *Culex modestus* for West Nile virus. *Journal of the American Mosquito Control Association* 2007; 23:233–6. [https://doi.org/10.2987/8756-971X\(2007\)23\[233:EOLVCO\]2.0.CO;2](https://doi.org/10.2987/8756-971X(2007)23[233:EOLVCO]2.0.CO;2) PMID: 17847861
34. Hilgenboecker K, Hammerstein P, Schlattmann P, Telschow A, Werren JH. How many species are infected with *Wolbachia*?—A statistical analysis of current data. *FEMS Microbiology Letters* 2008; 281:215–20. <https://doi.org/10.1111/j.1574-6968.2008.01110.x> PMID: 18312577
35. Hoffmann AA, Montgomery BL, Popovici J, Iturbe-Ormaetxe I, Johnson PH, Muzzi F, et al. Successful establishment of *Wolbachia* in *Aedes* populations to suppress dengue transmission. *Nature* 2011; 476:454–7. <https://doi.org/10.1038/nature10356> PMID: 21866160
36. Ant TH, Mancini MV, McNamara CJ, Rainey SM, Sinkins SP. *Wolbachia*-Virus interactions and arbovirus control through population replacement in mosquitoes. *Pathogens and Global Health* 2023; 117:245–58. <https://doi.org/10.1080/20477724.2022.2117939> PMID: 36205550
37. Leggewie M, Krümkamp R, Badusche M, Heitmann A, Jansen S, Schmidt-Chanasit J, et al. *Culex torrentium* mosquitoes from Germany are negative for *Wolbachia*. *Medical and Veterinary Entomology* 2018; 32:115–20. <https://doi.org/10.1111/mve.12270> PMID: 28906572
38. Glaser RL, Meola MA. The native *Wolbachia* endosymbionts of *Drosophila melanogaster* and *Culex quinquefasciatus* increase host resistance to west nile virus infection. *PLoS ONE* 2010; 5. <https://doi.org/10.1371/journal.pone.0011977> PMID: 20700535
39. Micieli MV, Glaser RL. Somatic *Wolbachia* (Rickettsiales: Rickettsiaceae) Levels in *Culex quinquefasciatus* and *Culex pipiens* (Diptera: Culicidae) and Resistance to West Nile Virus Infection. *Journal of Medical Entomology* 2014; 51:189–99. <https://doi.org/10.1603/ME13152> PMID: 24605469



40. Dodson BL, Hughes GL, Paul O, Matacchiero AC, Kramer LD, Rasgon JL. Wolbachia Enhances West Nile Virus (WNV) Infection in the Mosquito *Culex tarsalis*. *PLOS Neglected Tropical Diseases* 2014; 8: e2965. <https://doi.org/10.1371/journal.pntd.0002965> PMID: 25010200
41. Alomar AA, Pérez-Ramos DW, Kim D, Kendzierski NL, Eastmond BH, Alto BW, et al. Native Wolbachia infection and larval competition stress shape fitness and West Nile virus infection in *Culex quinquefasciatus* mosquitoes. *Frontiers in Microbiology* 2023; 14. <https://doi.org/10.3389/fmicb.2023.1138476> PMID: 37007535
42. Bergman A, Hesson JC. Wolbachia prevalence in the vector species *Culex pipiens* and *Culex torrentium* in a Sindbis virus-endemic region of Sweden. *Parasites and Vectors* 2021; 14:428. <https://doi.org/10.1186/s13071-021-04937-6> PMID: 34446060
43. Ricci I, Cancrini G, Gabrielli S, Amelio SD, Favia G. Searching for Wolbachia (Rickettsiales: Rickettsiaceae) in Mosquitoes (Diptera: Culicidae): Large Polymerase Chain Reaction Survey and New Identifications. *Journal of Medical Entomology* 2002; 39:562–7. <https://doi.org/10.1603/0022-2585-39.4.562> PMID: 12144285
44. Shaikevich E, Bogacheva A, Ganushkina L. *Dirofilaria* and Wolbachia in mosquitoes (Diptera: Culicidae) in central European Russia and on the Black Sea coast. *Parasite* 2019; 26. <https://doi.org/10.1051/PARASITE/2019002> PMID: 30644356
45. Bakonyi T, Haussig JM. West Nile virus keeps on moving up in Europe. *Eurosurveillance* 2020; 25. <https://doi.org/10.2807/1560-7917.ES.2020.25.46.2001938> PMID: 33213684
46. Vogels CBF, Göertz GP, Pijlman GP, Koenraadt CJM. Vector competence of European mosquitoes for west Nile virus. *Emerging Microbes and Infections* 2017; 6:e96. <https://doi.org/10.1038/emi.2017.82> PMID: 29116220
47. Tang Y, Anne Hapip C, Liu B, Fang CT. Highly sensitive TaqMan RT-PCR assay for detection and quantification of both lineages of West Nile virus RNA. *Journal of Clinical Virology* 2006; 36:177–82. <https://doi.org/10.1016/j.jcv.2006.02.008> PMID: 16675298
48. Cavrini F, Pepa MED, Gaibani P, Pierro AM, Rossini G, Landini MP, et al. A rapid and specific real-time RT-PCR assay to identify Usutu virus in human plasma, serum, and cerebrospinal fluid. *Journal of Clinical Virology* 2011; 50:221–3. <https://doi.org/10.1016/j.jcv.2010.11.008> PMID: 21156352
49. Rudolf M, Czajka C, Börstler J, Melaun C, Jöst H, von Thien H, et al. First Nationwide Surveillance of *Culex pipiens* Complex and *Culex torrentium* Mosquitoes Demonstrated the Presence of *Culex pipiens* Biotype *pipiens/molestus* Hybrids in Germany. *PLoS ONE* 2013; 8:e71832. <https://doi.org/10.1371/journal.pone.0071832> PMID: 24039724
50. Vogels CBF, van de Peppel LJJ, van Vliet AJH, Westenberg M, Ibañez-Justicia A, Stroo A, et al. Winter Activity and Aboveground Hybridization Between the Two Biotypes of the West Nile Virus Vector *Culex pipiens*. *Vector-Borne and Zoonotic Diseases* 2015; 15:619–26. <https://doi.org/10.1089/vbz.2015.1820> PMID: 26394124
51. Folmer O, Black M, Hoeh W, Lutz R, Vrijenhoek R. DNA primers for amplification of mitochondrial cytochrome c oxidase subunit I from diverse metazoan invertebrates. *Molecular Marine Biology and Biotechnology* 1994; 3:294–9. PMID: 7881515
52. Zhou W, Rousset F, O'Neill S. Phylogeny and PCR-based classification of Wolbachia strains using wsp gene sequences. *Proceedings of the Royal Society B: Biological Sciences* 1998; 265:509–15. <https://doi.org/10.1098/rspb.1998.0324> PMID: 9569669
53. Calvitti M, Moretti R, Skidmore AR, Dobson SL. Wolbachia strain wPip yields a pattern of cytoplasmic incompatibility enhancing a Wolbachia-based suppression strategy against the disease vector *Aedes albopictus*. *Parasites and Vectors* 2012; 5:254. <https://doi.org/10.1186/1756-3305-5-254> PMID: 23146564
54. Folly AJ, Sewgobind S, Hernández-Triana LM, Mansfield KL, Lean FZX, Lawson B, et al. Evidence for overwintering and autochthonous transmission of Usutu virus to wild birds following its redetection in the United Kingdom. *Transboundary and Emerging Diseases* 2022; 69:3684–92. <https://doi.org/10.1111/tbed.14738> PMID: 36217722
55. Martinet J-P, Bohers C, Vazeille M, Ferté H, Mousson L, Mathieu B, et al. Assessing vector competence of mosquitoes from northeastern France to West Nile virus and Usutu virus. *PLOS Neglected Tropical Diseases* 2023; 17:e0011144. <https://doi.org/10.1371/journal.pntd.0011144> PMID: 37276229
56. Bates TA, Chuong C, Rai P, Marano J, Waldman A, Klinger A, et al. American *Aedes japonicus japonicus*, *Culex pipiens pipiens*, and *Culex restuans* mosquitoes have limited transmission capacity for a recent isolate of Usutu virus. *Virology* 2021; 555:64–70. <https://doi.org/10.1016/j.virol.2020.12.023> PMID: 33454558
57. Sieg M, Schmidt V, Ziegler U, Keller M, Höper D, Heenemann K, et al. Outbreak and Cocirculation of Three Different Usutu Virus Strains in Eastern Germany. *Vector-Borne and Zoonotic Diseases* 2017; 17:662–4. <https://doi.org/10.1089/vbz.2016.2096> PMID: 28816628

58. Scheuch D, Schäfer M, Eiden M, Heym E, Ziegler U, Walther D, et al. Detection of Usutu, Sindbis, and Batai Viruses in Mosquitoes (Diptera: Culicidae) Collected in Germany, 2011–2016. *Viruses* 2018; 10:389. <https://doi.org/10.3390/v10070389> PMID: 30041410
59. Cadar D, Bosch S, Jöst H, Börstler J, Garigliany MM, Becker N, et al. Putative lineage of novel African usutu virus, central Europe. *Emerging Infectious Diseases* 2015; 21:1647–50. <https://doi.org/10.3201/eid2109.142026> PMID: 26291923
60. Prioteasa FL, Dinu S, Tiron GV, Stancu IG, Fălcută E, Ceianu CS, et al. First Detection and Molecular Characterization of Usutu Virus in *Culex pipiens* Mosquitoes Collected in Romania. *Microorganisms* 2023; 11:684. <https://doi.org/10.3390/microorganisms11030684> PMID: 36985256
61. Kemenesi G, Buzás D, Zana B, Kurucz K, Krtinic B, Kepner A, et al. First genetic characterization of Usutu virus from *Culex pipiens* mosquitoes Serbia, 2014. *Infection, Genetics and Evolution* 2018; 63:58–61. <https://doi.org/10.1016/j.meegid.2018.05.012> PMID: 29778766
62. Busquets N, Alba A, Allepuz A, Aranda C, Núñez JI. Usutu virus sequences in *Culex pipiens* (Diptera: Culicidae), Spain. *Emerging Infectious Diseases* 2008; 14:861–3. <https://doi.org/10.3201/eid1405.071577> PMID: 18439389
63. Bakran-Lebl K, Camp JV, Kolodziejek J, Weidinger P, Hufnagl P, Cabal Rosel A, et al. Diversity of West Nile and Usutu virus strains in mosquitoes at an international airport in Austria. *Transboundary and Emerging Diseases* 2022; 69:2096–109. <https://doi.org/10.1111/tbed.14198> PMID: 34169666
64. Calzolari M, Bonilauri P, Bellini R, Albieri A, Defilippo F, Tamba M, et al. Usutu Virus Persistence and West Nile Virus Inactivity in the Emilia-Romagna Region (Italy) in 2011. *PLoS ONE* 2013; 8. <https://doi.org/10.1371/journal.pone.0063978> PMID: 23667694
65. Klobucar A, Savic V, Posavec MC, Petrinic S, Kuhar U, Toplak I, et al. Screening of mosquitoes for west nile virus and usutu virus in Croatia, 2015–2020. *Tropical Medicine and Infectious Disease* 2021; 6. <https://doi.org/10.3390/tropicalmed6020045> PMID: 33918386
66. Calzolari M, Chiapponi C, Bonilauri P, Lelli D, Baioni L, Barbieri I, et al. Co-circulation of two Usutu virus strains in Northern Italy between 2009 and 2014. *Infection, Genetics and Evolution* 2017; 51:255–62. <https://doi.org/10.1016/j.meegid.2017.03.022> PMID: 28341546
67. Bakonyi T, Busquets N, Nowotny N. Comparison of complete genome sequences of usutu virus strains detected in Spain, Central Europe, and Africa. *Vector-Borne and Zoonotic Diseases* 2014; 14:324–9. <https://doi.org/10.1089/vbz.2013.1510> PMID: 24746182
68. Scaramozzino P, Carvelli A, Bruni G, Cappiello G, Censi F, Magliano A, et al. West Nile and Usutu viruses co-circulation in central Italy: outcomes of the 2018 integrated surveillance. *Parasites and Vectors* 2021; 14. <https://doi.org/10.1186/s13071-021-04736-z> PMID: 33962673
69. Pautasso A, Radaelli MC, Ballardini M, Francese DR, Verna F, Modesto P, et al. Detection of West Nile and Usutu Viruses in Italian Free Areas: Entomological Surveillance in Piemonte and Liguria Regions, 2014. *Vector-Borne and Zoonotic Diseases* 2016; 16:292–4. <https://doi.org/10.1089/vbz.2015.1851> PMID: 26862776
70. Calzolari M, Gaibani P, Bellini R, Defilippo F, Pierro A, Albieri A, et al. Mosquito, bird and human surveillance of west nile and Usutu viruses in Emilia-Romagna region (Italy) in 2010. *PLoS ONE* 2012; 7. <https://doi.org/10.1371/journal.pone.0038058> PMID: 22666446
71. Čabanová V, Tichá E, Bradbury RS, Zubriková D, Valentová D, Chovancová G, et al. Mosquito surveillance of West Nile and Usutu viruses in four territorial units of Slovakia and description of a confirmed autochthonous human case of West Nile fever, 2018 to 2019. *Eurosurveillance* 2021; 26. <https://doi.org/10.2807/1560-7917.ES.2021.26.19.2000063> PMID: 33988125
72. Calzolari M, Bonilauri P, Grisendi A, Dalmonte G, Vismarra A, Lelli D, et al. Arbovirus Screening in Mosquitoes in Emilia-Romagna (Italy, 2021) and Isolation of Tahyna Virus. *Microbiology Spectrum* 2022; 10. <https://doi.org/10.1128/spectrum.01587-22> PMID: 36165787
73. Tamba M, Bonilauri P, Bellini R, Calzolari M, Albieri A, Sambri V, et al. Detection of usutu virus within a west nile virus surveillance program in northern Italy. *Vector-Borne and Zoonotic Diseases* 2011; 11:551–7. <https://doi.org/10.1089/vbz.2010.0055> PMID: 20849275
74. Wang H, Abbo SR, Visser TM, Westenberg M, Geertsema C, Fros JJ, et al. Competition between Usutu virus and West Nile virus during simultaneous and sequential infection of *Culex pipiens* mosquitoes. *Emerging Microbes and Infections* 2020; 9:2642–52. <https://doi.org/10.1080/22221751.2020.1854623> PMID: 33215969
75. Worwa G, Hutton AA, Frey M, Duggal NK, Brault AC, Reisen WK. Increases in the competitive fitness of West Nile virus isolates after introduction into California. *Virology* 2018; 514:170. <https://doi.org/10.1016/j.virol.2017.11.017> PMID: 29195094
76. Benzarti E, Rivas J, Sarlet M, Franssen M, Moula N, Savini G, et al. Usutu Virus Infection of Embryonated Chicken Eggs and a Chicken Embryo-Derived Primary Cell Line. *Viruses* 2020, Vol 12, Page 531 2020;12:531. <https://doi.org/10.3390/v12050531> PMID: 32408481

77. Hardy JL, Houk EJ, Kramer LD, Reeves WC. Intrinsic Factors Affecting Vector Competence of Mosquitoes for Arboviruses. *Annual Review of Entomology* 1983; 28:229–62. <https://doi.org/10.1146/annurev.en.28.010183.001305> PMID: 6131642
78. Gargan TP, Bailey CL, Higbee GA, Gad A, El Said S. The effect of laboratory colonization on the vector-pathogen interactions of Egyptian *Culex pipiens* and Rift Valley fever virus. *American Journal of Tropical Medicine and Hygiene* 1983; 32:1154–63. <https://doi.org/10.4269/ajtmh.1983.32.1154> PMID: 6625070
